# Supplementary material
Source: PubMed Central journal article supplement (PMC6548650)
Supplement: NIHMS1521523-supplement-1.pdf [file NIHMS1521523-supplement-1.pdf]

s-Figure 1

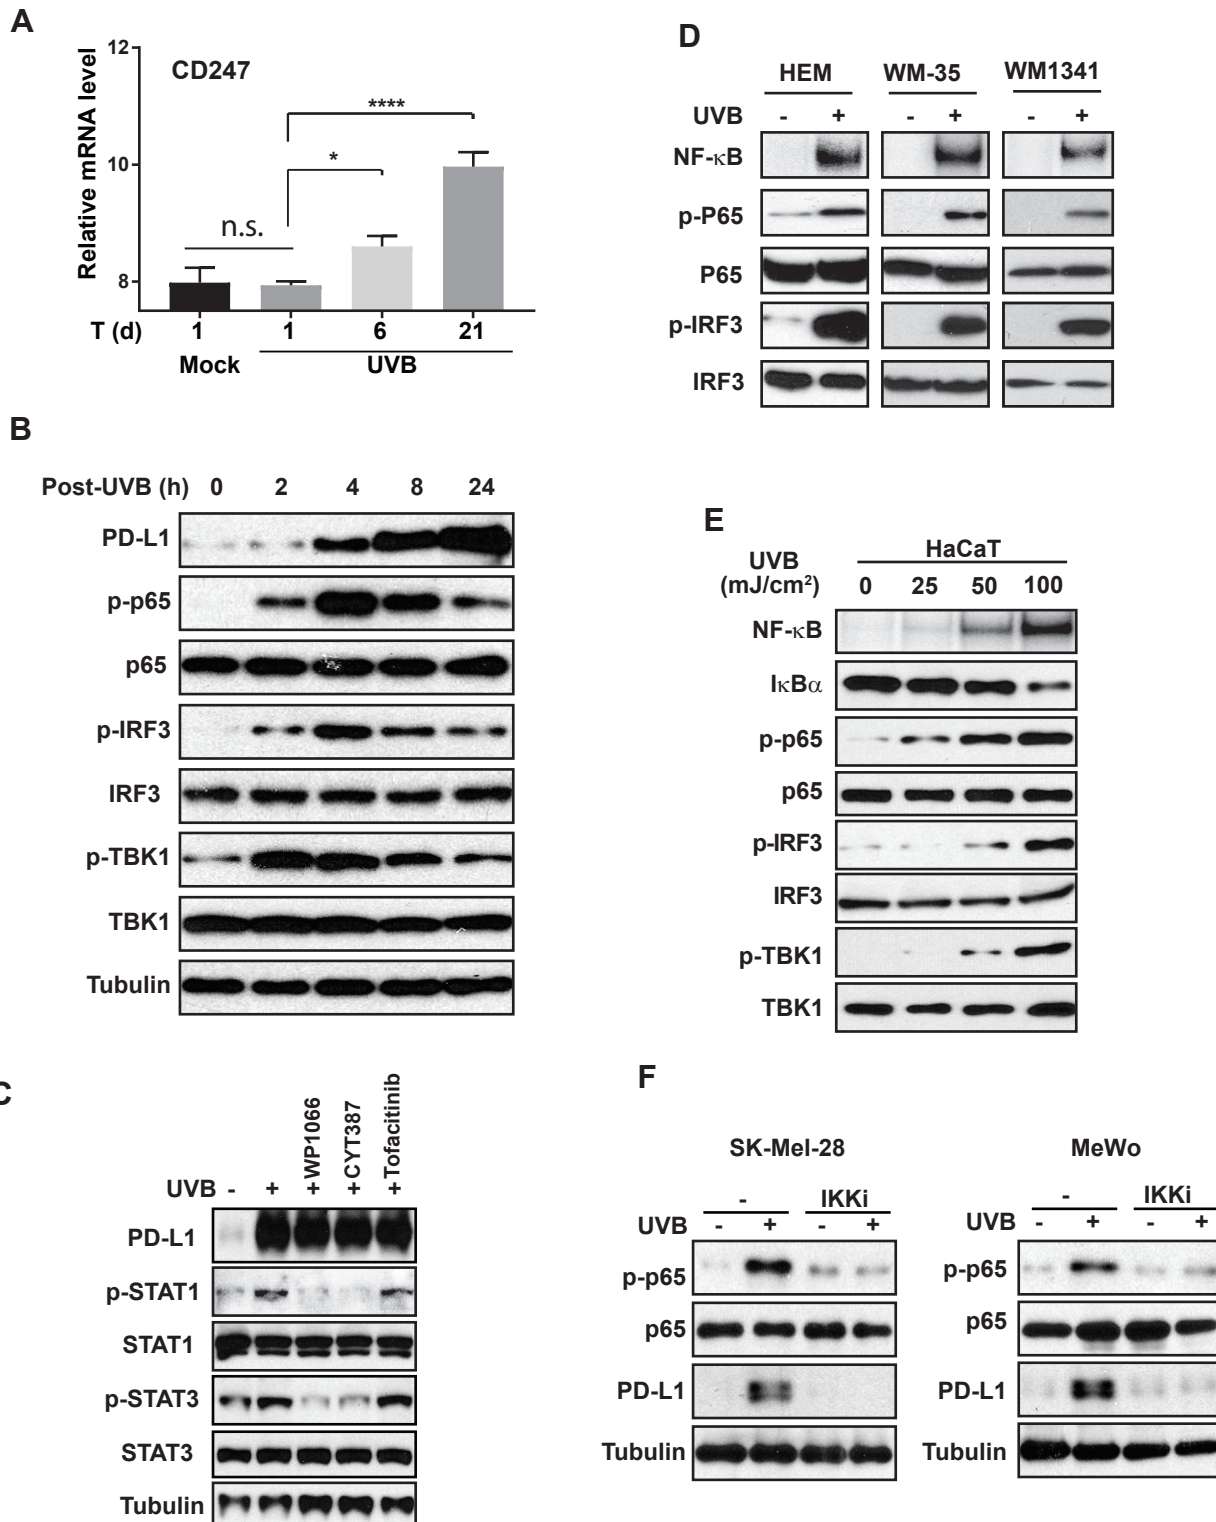

**Supplemental Figure 1.** (A) Dermal melanocytic PD-L1/CD274 expression from neonatal mice treated with UVB on day 1, 6 or 21 and mock-treated mice were retrieved from GSE25164 and plotted as shown. (B) SK-Mel-28 cells treated by UVB (50 mJ/cm<sup>2</sup>) and harvested at the times indicated. Whole cell extracts were analyzed by western blot using the indicated antibodies. (C) SK-Mel-28 cells treated by UVB (50 mJ/cm<sup>2</sup>) alone or along with WP1066 (5 μM), CYT387 (10 μM) and Tofacitinib (10 μM) were analyzed by western blot using the indicated antibodies. (D) HEM, WM-35 and WM-1614 cells were exposed to UVB (50 mJ/cm<sup>2</sup>). After 4 h, the activation of NF-κB and IRF3 was detected by western blot. (E) HaCat cells were treated with increasing doses of UVB as shown. After 4 h, EMSA (NF-κB) and western blot were performed with the indicated antibodies. (F) SK-Mel-28 or MeWo cells were treated by UVB (50 mJ/cm<sup>2</sup>) alone or along with IKK inhibitor (TPCA-1, IKKi). After 4 h, whole-cell extracts were analyzed by western blot. \*: p<0.05; \*\*\*\*: p<0.0001.
