# Supplementary material
Source: PubMed Central journal article supplement (PMC6548650)
Supplement: NIHMS1521523-supplement-3.pdf [file NIHMS1521523-supplement-3.pdf]

s-Figure 3

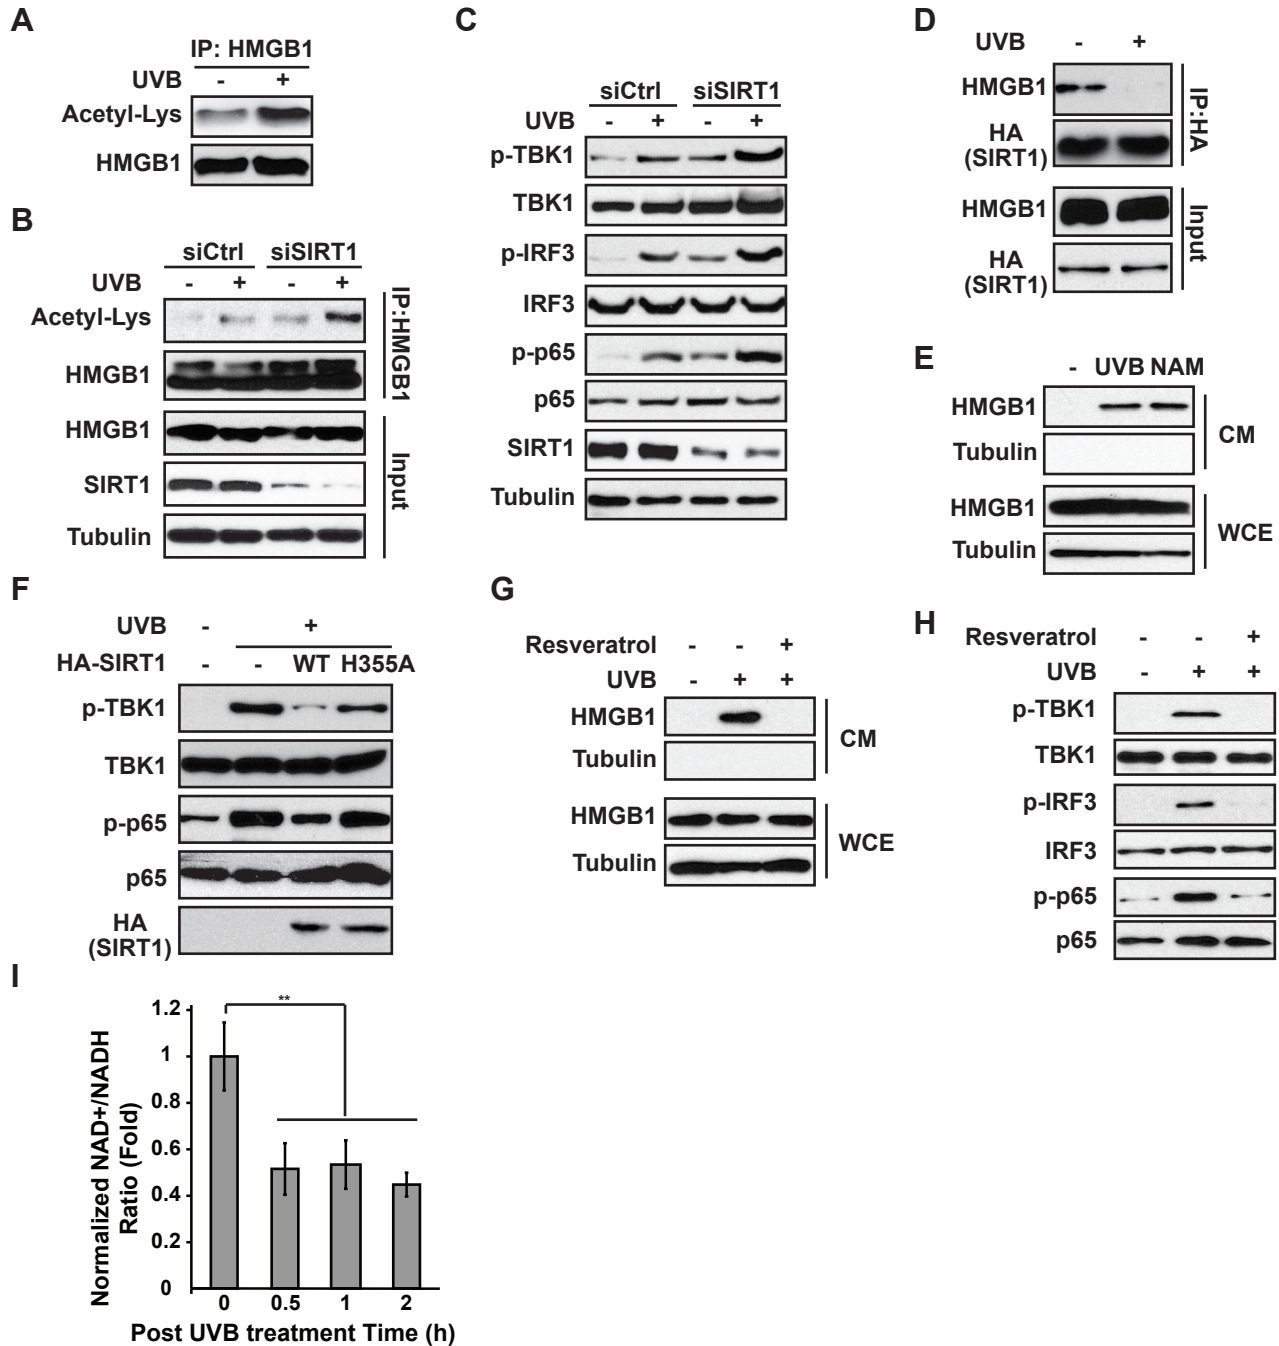

**Supplemental Figure 3.** (A) SK-Mel-28 cells were treated with UVB (50 mJ/cm<sup>2</sup>). Cells were harvested at 4 h after the treatment; immunoprecipitated (IP) HMGB1 was probed with anti-acetylated Lys. (B) SK-Mel-28 cells were transfected with control (siCtrl) or SIRT1 siRNA (siSIRT1) as shown. Cells were harvested at 4 h after UVB (50 mJ/cm<sup>2</sup>) exposure and acetylation of HMGB1 was analyzed as in (A). (C) SK-Mel-28 cells were treated as in (B). Whole-cell extracts were analyzed by indicated antibodies. (D) SK-Mel-28 cells were transfected with HA-SIRT1 and treated with UVB (50 mJ/cm<sup>2</sup>). Cells were harvested at 4 h after treatment and the interaction of HMGB1 and SIRT1 was analyzed with Co-IP. (E) SK-Mel-28 cells were treated with UVB (50 mJ/cm<sup>2</sup>) or nicotinamide (10mM, NAM). Conditioned media (CM) and whole-cell extracts were collected at 4 h after treatment and analyzed by western blots. (F) SK-Mel-28 cells were transfected with control, wild-type (WT) SIRT1 or dominant-negative H355A mutant of SIRT1, and treated with UVB (50 mJ/cm<sup>2</sup>). Whole-cell lysates were analyzed by western blot with the indicated antibodies. (G) SK-Mel-28 cells were pre-incubated with resveratrol (50  $\mu$ M, 4 h) or DMSO. Cells were then exposed to UVB (50 mJ/cm<sup>2</sup>). CM and whole-cell extracts were collected and analyzed as in (D). (H) Whole-cell lysates from SK-Mel-28 cells treated as in (F) were analyzed by indicated antibodies. (I) SK-Mel-28 cells were exposed to UVB (50 mJ/cm<sup>2</sup>). Cells were harvested at indicated times after treatment and the ratio of NAD<sup>+</sup>/NADH was analyzed. \*\*: p<0.01.
