# Supplementary material
Source: PubMed Central journal article supplement (PMC6548650)
Supplement: NIHMS1521523-supplement-5.pdf [file NIHMS1521523-supplement-5.pdf]

s-Figure 5

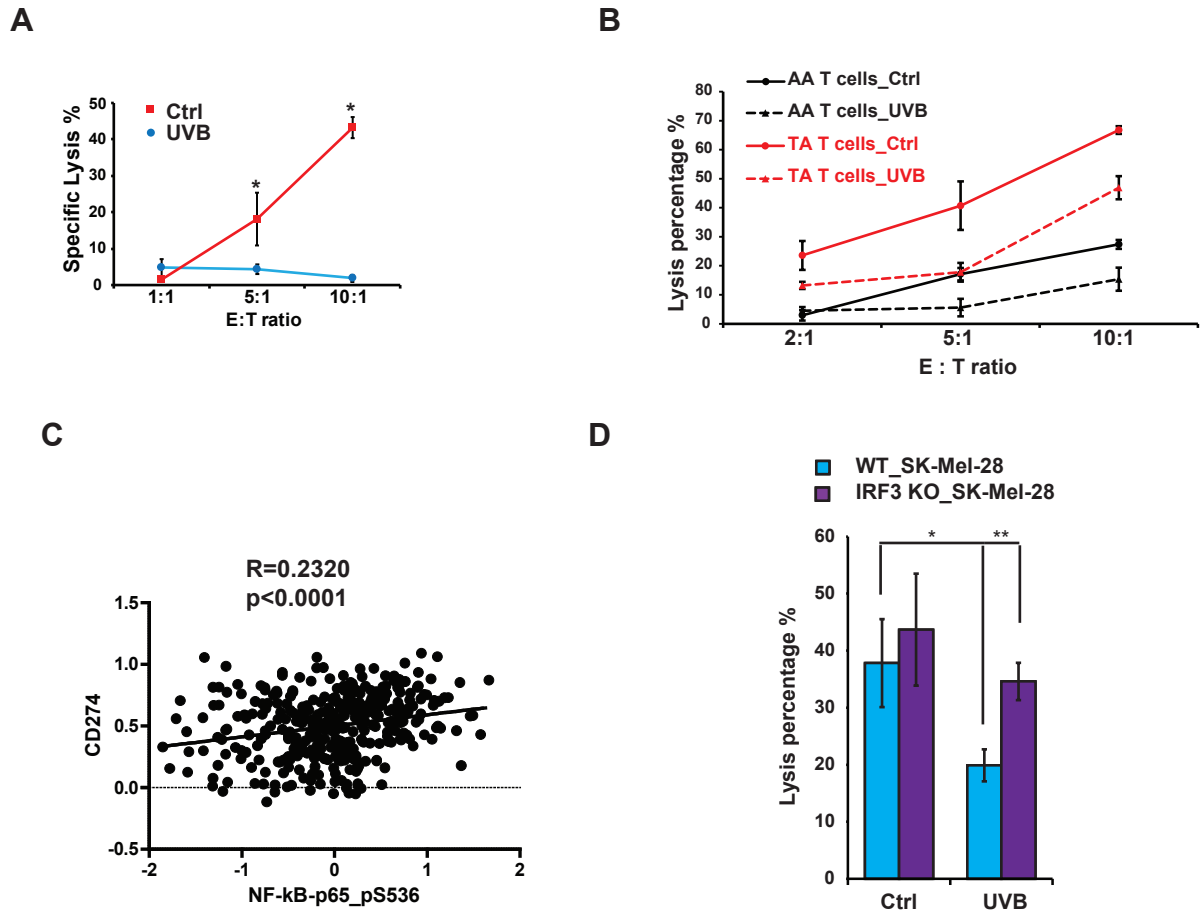

**Supplemental Figure 5.** (A) B16 cells were mock treated (Ctrl) or treated by UVB (UVB) as indicated. B16 cells (target, T) and activated mouse CD8+ T cells (effector, E) were incubated at indicated E:T ratio. Cytotoxicity was quantified by LDH assay. (B) Human CD8+ T cells were activated either by anti-CD3/CD28 antibodies (AA-T cells) or by incubation with inactivated SK-Mel-28 melanoma cells (TA T cells). SK-Mel-28 cells were mock treated or treated by UVB, and incubated at the indicated E:T ratios. Cytotoxicity was quantified by LDH assay. (C) Correlation between levels of CD274 (RNAseq) and NF- $\kappa$ B-p65\_pS536 (RPPA) was determined with Pearson's correlation analysis. (D) T-cell killing assays as in (B) were performed using wildtype or IRF3-knockout (KO) SK-Mel-28 cells treated by UVB (50 mJ/cm<sup>2</sup>) or mock treated, and activated CD8+ T cells (E:T=5:1). \*: p<0.05; \*\*: p<0.01.
