# Supplementary material
Source: PubMed Central journal article supplement (PMC6548650)
Supplement: NIHMS1521523-supplement-6.pdf [file NIHMS1521523-supplement-6.pdf]

s-Figure 6

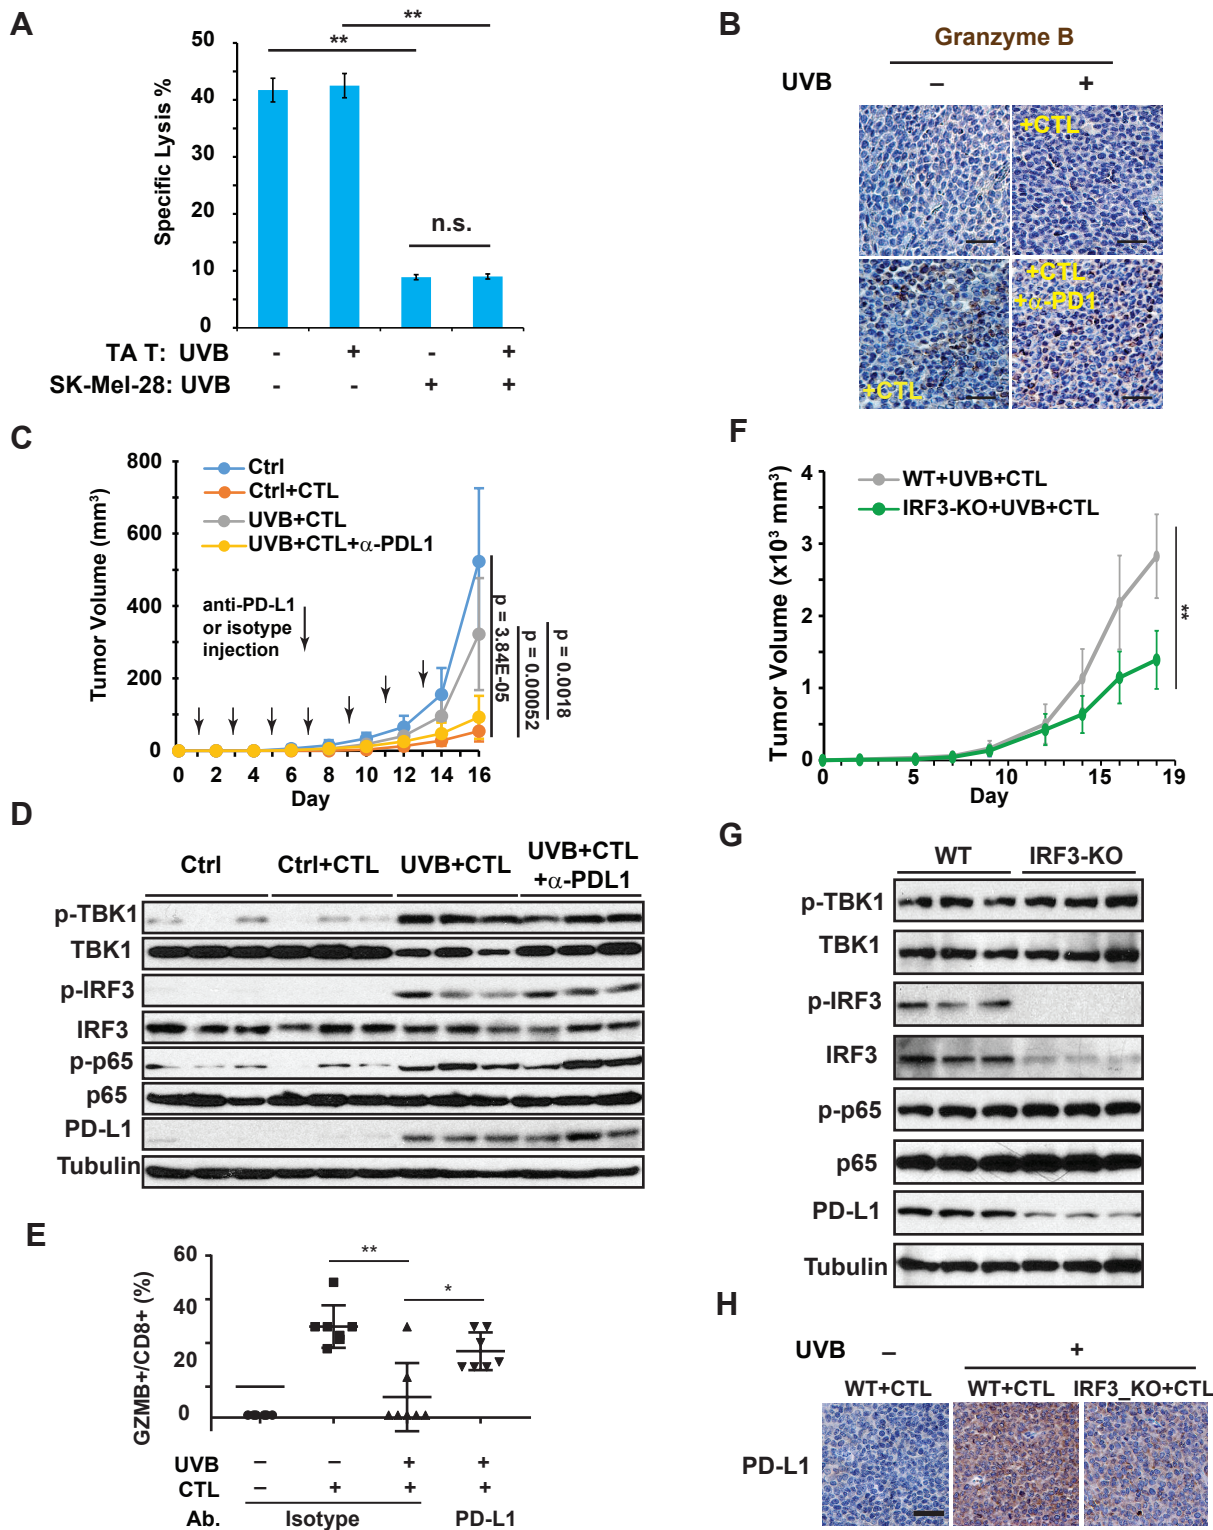

**Supplemental Figure 6.** (A) Human tumor (SK-Mel-28) reactive CD8<sup>+</sup> T cells (TA T cells) and SK-Mel-28 cells were treated with UVB (50 mJ/cm<sup>2</sup>) as indicated. T-cell killing assay was carried out (effector: target, E:T=5:1) and cytotoxicity was quantified by LDH assay. (B) Granzyme B<sup>+</sup> cells in SK-Mel-28 xenograft tumors were determined by IHC. Scale bar: 20  $\mu$ m. (C) B16-OVA cells treated with UVB or mock treated were co-transplanted with activated OTI-CD8<sup>+</sup> T cells/CTLs as indicated (n=7 per group). Mice with xenograft tumors were treated with anti-PD-L1 (100  $\mu$ g/mouse) antibodies or isotype control as shown. Tumor growth was measured by calipers. The blue line shows tumors resulting from B16-OVA cells not receiving UVB and transplanted without CTLs. (D) Lysates from B16-OVA tumor samples (3 per group) were analyzed by western blot with the indicated antibodies. (E) Percentage of Granzyme B (GZMB<sup>+</sup>) positive cells in CD8<sup>+</sup> cell population isolated from B16-OVA xenograft tumors of respective group were quantified by flow cytometry. (F) UVB-treated WT or IRF3-knockout (KO) SK-Mel-28-Luc cells were co-transplanted with tumor antigen-activated CD8<sup>+</sup> T cells/CTLs as indicated. Tumor growth was measured by caliper. (G) Lysates from tumor samples (3 per group) were analyzed by western blot with indicated antibodies. (H) PD-L1 expression in xenograft tumors were determined by IHC. Scale bar: 20  $\mu$ m. \*\*: p<0.01.
